# Supplementary material for: Systemic BCG administration stimulates NK and T cell-mediated antitumor lung immunity and overcomes tumor resistance to immune checkpoint inhibition
Source: Research Square preprint supplement (doi:10.21203/rs.3.rs-2086495/v1), 2022-10-31
Supplement: Supplementary file 1 [file 5e8e9f08ef13755be95c4467.pdf]

## Reporting Summary

Nature Portfolio wishes to improve the reproducibility of the work that we publish. This form provides structure for consistency and transparency in reporting. For further information on Nature Portfolio policies, see our [Editorial Policies](#) and the [Editorial Policy Checklist](#).

### Statistics

For all statistical analyses, confirm that the following items are present in the figure legend, table legend, main text, or Methods section.

n/a Confirmed

- |                                     |                                     |                                                                                                                                                                                                                                                            |
|-------------------------------------|-------------------------------------|------------------------------------------------------------------------------------------------------------------------------------------------------------------------------------------------------------------------------------------------------------|
| <input type="checkbox"/>            | <input checked="" type="checkbox"/> | The exact sample size ( $n$ ) for each experimental group/condition, given as a discrete number and unit of measurement                                                                                                                                    |
| <input type="checkbox"/>            | <input checked="" type="checkbox"/> | A statement on whether measurements were taken from distinct samples or whether the same sample was measured repeatedly                                                                                                                                    |
| <input type="checkbox"/>            | <input checked="" type="checkbox"/> | The statistical test(s) used AND whether they are one- or two-sided<br><i>Only common tests should be described solely by name; describe more complex techniques in the Methods section.</i>                                                               |
| <input checked="" type="checkbox"/> | <input type="checkbox"/>            | A description of all covariates tested                                                                                                                                                                                                                     |
| <input type="checkbox"/>            | <input checked="" type="checkbox"/> | A description of any assumptions or corrections, such as tests of normality and adjustment for multiple comparisons                                                                                                                                        |
| <input type="checkbox"/>            | <input checked="" type="checkbox"/> | A full description of the statistical parameters including central tendency (e.g. means) or other basic estimates (e.g. regression coefficient) AND variation (e.g. standard deviation) or associated estimates of uncertainty (e.g. confidence intervals) |
| <input type="checkbox"/>            | <input checked="" type="checkbox"/> | For null hypothesis testing, the test statistic (e.g. $F$ , $t$ , $r$ ) with confidence intervals, effect sizes, degrees of freedom and $P$ value noted<br><i>Give <math>P</math> values as exact values whenever suitable.</i>                            |
| <input checked="" type="checkbox"/> | <input type="checkbox"/>            | For Bayesian analysis, information on the choice of priors and Markov chain Monte Carlo settings                                                                                                                                                           |
| <input checked="" type="checkbox"/> | <input type="checkbox"/>            | For hierarchical and complex designs, identification of the appropriate level for tests and full reporting of outcomes                                                                                                                                     |
| <input checked="" type="checkbox"/> | <input type="checkbox"/>            | Estimates of effect sizes (e.g. Cohen's $d$ , Pearson's $r$ ), indicating how they were calculated                                                                                                                                                         |

*Our web collection on [statistics for biologists](#) contains articles on many of the points above.*

### Software and code

Policy information about [availability of computer code](#)

|                 |                                                                                                                                                                                                                                                                                                                                                                                        |
|-----------------|----------------------------------------------------------------------------------------------------------------------------------------------------------------------------------------------------------------------------------------------------------------------------------------------------------------------------------------------------------------------------------------|
| Data collection | For mouse experiments, flow cytometry data was collected using a Beckman Coulter Gallios flow cytometer. For experiments with human PBMCs, data was collected using a CytoFlex (Beckman Coulter) flow cytometer. For ELISA and luminiscence measurements, a Multi-Mode Microplate Reader (Synergy™ HT, BioTek) was used. Cell sorting was performed using a SH800S Cell Sorter (Sony). |
| Data analysis   | Flow cytometry data from mouse experiments was analyzed with Weasel v3.0.2. Flow cytometry data from human experiments was analyzed using Kaluza software. Visualization and statistical analysis was performed using GraphPad Prism 8 software.                                                                                                                                       |

For manuscripts utilizing custom algorithms or software that are central to the research but not yet described in published literature, software must be made available to editors and reviewers. We strongly encourage code deposition in a community repository (e.g. GitHub). See the Nature Portfolio [guidelines for submitting code & software](#) for further information.

### Data

Policy information about [availability of data](#)

All manuscripts must include a [data availability statement](#). This statement should provide the following information, where applicable:

- Accession codes, unique identifiers, or web links for publicly available datasets
- A description of any restrictions on data availability
- For clinical datasets or third party data, please ensure that the statement adheres to our [policy](#)

All source data are accessible upon request.

## Human research participants

Policy information about [studies involving human research participants and Sex and Gender in Research.](#)

|                             |                                                                                                                                                                                                                                                                                                                                                                                                                                                                                        |
|-----------------------------|----------------------------------------------------------------------------------------------------------------------------------------------------------------------------------------------------------------------------------------------------------------------------------------------------------------------------------------------------------------------------------------------------------------------------------------------------------------------------------------|
| Reporting on sex and gender | No gender information from healthy donors who provided PBMCs was provided by Transfusion Centre                                                                                                                                                                                                                                                                                                                                                                                        |
| Population characteristics  | No information from healthy donors who provided PBMCs was provided by Transfusion Centre, with regard to population characteristics                                                                                                                                                                                                                                                                                                                                                    |
| Recruitment                 | PBMCs from buffy coats of healthy donors were obtained from the Regional Transfusion Centre (Madrid)                                                                                                                                                                                                                                                                                                                                                                                   |
| Ethics oversight            | PBMCs from buffy coats of healthy donors were obtained from the Regional Transfusion Centre (Madrid) with ethical permission and experimental protocols approved by the institutional committees: Regional Transfusion Centre (PO-DIS-09) and assessed by the bioethics committee of CSIC. Informed consent was obtained at the Transfusion Centre from all participants. All methods were carried out in accordance with biosafety guidelines and regulations authorized by CNB-CSIC. |

Note that full information on the approval of the study protocol must also be provided in the manuscript.

## Field-specific reporting

Please select the one below that is the best fit for your research. If you are not sure, read the appropriate sections before making your selection.

☒ Life sciences ☐ Behavioural & social sciences ☐ Ecological, evolutionary & environmental sciences

For a reference copy of the document with all sections, see [nature.com/documents/nr-reporting-summary-flat.pdf](https://nature.com/documents/nr-reporting-summary-flat.pdf)

## Life sciences study design

All studies must disclose on these points even when the disclosure is negative.

|                 |                                                                                                                                                                                                                                                                                                      |
|-----------------|------------------------------------------------------------------------------------------------------------------------------------------------------------------------------------------------------------------------------------------------------------------------------------------------------|
| Sample size     | Statistical methods were not used to predetermine sample size. Sample size followed common standards in the field. The number of animals used for each experiments was estimated based on previous and pilot studies. Number of animals for each experimental group are described in Figure legends. |
| Data exclusions | Outliers were not excluded for statistical analysis.                                                                                                                                                                                                                                                 |
| Replication     | Data supporting the main conclusions of the study are displayed as pooled data from at least two independent experiments, with at least 4 biological replicates per experimental group and experiment. Experiments performed once were done with at least 6 biological replicates per group.         |
| Randomization   | Tumors were induced at day 0 and mice were randomized into different experimental groups at day 7, prior to treatment application                                                                                                                                                                    |
| Blinding        | Animal monitoring and data analysis were not blinded.                                                                                                                                                                                                                                                |

## Reporting for specific materials, systems and methods

We require information from authors about some types of materials, experimental systems and methods used in many studies. Here, indicate whether each material, system or method listed is relevant to your study. If you are not sure if a list item applies to your research, read the appropriate section before selecting a response.

### Materials & experimental systems

| n/a                                 | Involved in the study                                           |
|-------------------------------------|-----------------------------------------------------------------|
| <input type="checkbox"/>            | <input checked="" type="checkbox"/> Antibodies                  |
| <input type="checkbox"/>            | <input checked="" type="checkbox"/> Eukaryotic cell lines       |
| <input checked="" type="checkbox"/> | <input type="checkbox"/> Palaeontology and archaeology          |
| <input type="checkbox"/>            | <input checked="" type="checkbox"/> Animals and other organisms |
| <input checked="" type="checkbox"/> | <input type="checkbox"/> Clinical data                          |
| <input checked="" type="checkbox"/> | <input type="checkbox"/> Dual use research of concern           |

### Methods

| n/a                                 | Involved in the study                              |
|-------------------------------------|----------------------------------------------------|
| <input checked="" type="checkbox"/> | <input type="checkbox"/> ChIP-seq                  |
| <input type="checkbox"/>            | <input checked="" type="checkbox"/> Flow cytometry |
| <input checked="" type="checkbox"/> | <input type="checkbox"/> MRI-based neuroimaging    |

## Antibodies

|                 |                                                                                                                                 |
|-----------------|---------------------------------------------------------------------------------------------------------------------------------|
| Antibodies used | The following antibodies were used (from Miltenyi unless otherwise noted): CD45-Vioblue, clone REA737; CD45-PerCP-Vio700, clone |
|-----------------|---------------------------------------------------------------------------------------------------------------------------------|

REA737; CD11b-PerCP-Vio700, clone REA592; CD11c-PerCP-Vio700, clone REA754; CD11c-PE, clone REA754; CD11c-FITC, clone REA754; F4/80-PE, clone REA126; XCR1-APC, clone REA707; MHCII-Vioblue, clone REA813; H2Kb/Db-APC, clone REA932; CD3-PerCP-Vio700, clone REA641; CD4-FITC, clone REA604; CD4-APCVio770, clone REA604; CD8-PE, clone REA601; CD8-APC, clone REA601, CD86-VioBright, clone REA1190; CD86-PE, clone REA1190; CD40-VioBright, clone REA965; CD172 $\alpha$ -APCVio-770, clone REA1201 (Sirp $\alpha$ ), NKp46-PE, clone REA815, CD64-APCVio770, clone REA286; Siglec-F-APC, clone REA798; Ly6C-APC, clone REA796; PD-L1-PE (BD, clone MIH5), Granzyme B-PE, clone REA226; T-bet-PE, clone REA102; GATA3-APC, clone REA174; Ly6G-Vioblue, clone REA526; CD49b-APCVio770, clone DX5; CCL5-PE, (BD, clone 2E9/CCL5), IFN $\gamma$ -APC, clone REA638, IFN $\gamma$ -FITC, clone REA638, IFN $\gamma$ -PE, clone REA638, IL12-PE, clone REA136, CD107a-FITC (BD, clone 1D4B), CD28 NA/LE (BD, clone 37.51), CD3 functional grade (clone 145-2C11).

For human experiments, antibodies for flow cytometry were: CD3-PB, CD16-PE-Cy7 and CD56-PE from Biolegend.

For in vivo depletion experiments, anti-CD4 (clone GK1.5), anti-CD8 (clone 2.43) and antiNK1.1 (clone PK136) were used, from BioXCell.

For treatments, anti-PD-L1 (clone 10F.9G2) was used, from BioXCell.

Validation

All antibodies used in the study are commercially available and validated by the manufacturer.

## Eukaryotic cell lines

Policy information about [cell lines and Sex and Gender in Research](#)

Cell line source(s)

B16-F10 and B16-F10.gp33 cells were given by Dr. Julián Pardo. LLC cells were given by Dr. David Sancho. B16-F10-ZsGreenLuc and LLC-ZsGreenLuc cells were made in the laboratory by transfection with a lentivirus encoding ZsGreen and firefly luciferase and sorted based on high expression of ZsGreen. For the generation of LLC-B2m $^{-/-}$  and B16-F10-B2m $^{-/-}$  cell lines, parental cells were transfected with CRISPR-Cas9 plasmids targeting the  $\beta$ 2-microglobulin gene (purchased from SantaCruz Biotechnology) and cells were selected with puromycin and then sorted based on lack of MHC-I expression after staining with an antibody directed to H2Kb/Db (Miltenyi). Cells were cultured with complete DMEM, containing 10% inactivated Fetal Bovine Serum (FBS), Glutamax (Sigma) and penicillin/streptomycin (Sigma) and were always used with less than 8 passages from thawing. The human lung cancer cell lines H1322 (bronchi-alveolar carcinoma) and H2188 (lung adenocarcinoma) were obtained from Dr. A. Romero (Puerta de Hierro Hospital, Madrid).

Authentication

The human lung cancer cell lines H1322 and H2188 were authenticated by satellite genotyping. Mouse cell lines were not authenticated.

Mycoplasma contamination

Cells were routinely tested for mycoplasma and no mycoplasma contamination was detected.

Commonly misidentified lines  
(See [ICLAC](#) register)

No misidentified lines were used in the study

## Animals and other research organisms

Policy information about [studies involving animals](#); [ARRIVE guidelines](#) recommended for reporting animal research, and [Sex and Gender in Research](#)

Laboratory animals

C57BL/6JR mice were purchased to Janvier Biolabs. Mouse strain deficient for interferon gamma (Ifny $^{-/-}$ ) bred on the B6 background were purchased from Jackson Laboratories. The mouse strains deficient for Perforin (Perf $^{-/-}$ ) and Batf3 (Batf3 $^{-/-}$ ) were bred in the facilities of the Centro de Investigaciones Biomédicas de Aragón (CIBA). 8-12 weeks-old male and female mice were used in the study.

Wild animals

No wild animals were used in the study

Reporting on sex

For experiments involving B16F10 tumor models, they were coinducted in female mice as strong differences between male and female were observed previously in pilot studies, finding that male mice generated a lower number of metastasis upon intravenous administration of B16-F10 cells. In the case of LLC lung tumor models, male and female mice were used since no differences were found between them.

Field-collected samples

The study did not involve samples collected from the field

Ethics oversight

Experimental work was conducted in agreement with European and national directives for protection of experimental animals, and experimental procedures were approved by the Ethics Committee for Animal Experiments of University of Zaragoza (PI46/18, PI33/15 and PI50/14).

Note that full information on the approval of the study protocol must also be provided in the manuscript.

## Flow Cytometry

### Plots

Confirm that:

- ☒ The axis labels state the marker and fluorochrome used (e.g. CD4-FITC).
- ☒ The axis scales are clearly visible. Include numbers along axes only for bottom left plot of group (a 'group' is an analysis of identical markers).
- ☒ All plots are contour plots with outliers or pseudocolor plots.
- ☒ A numerical value for number of cells or percentage (with statistics) is provided.

### Methodology

Sample preparation

Lungs were aseptically removed and homogenized in DMEM containing deoxyribonuclease I (DNase I, 40 U ml<sup>-1</sup>; AppliChem) and collagenase D (2 mg ml<sup>-1</sup>; Roche) using a GentleMacs dissociator (Miltenyi Biotec) according to manufacturer's instructions. Lungs were incubated at 37°C for 30 min and further homogenized with the GentleMacs dissociator. The homogenates were filtered through a 70 µm cell strainer (MACS SmartStainers, Miltenyi Biotec). Erythrocytes were lysed with RBC Lysing Buffer for 1 min and single cells were resuspended in PBS with 2% FBS and 1 mM EDTA and stained for surface and intracellular markers. Spleens and lymph nodes were mashed with the back of a syringe in RPMI with 2 mg ml<sup>-1</sup> Collagenase D and 40 U ml<sup>-1</sup> DNase I, incubated for 20 min at 37°C and strained through a 70 µm cell strainer before lysing erythrocytes with RBC Lysing Buffer for 1 min.

Instrument

Data was acquired with a Beckman Coulter Gallios flow cytometer for mouse experiments, and with a Beckman Coulter CytoFlex for human experiments.

Software

Data was analyzed with Wasel v3.0.2 for mouse experiments and with Kaluza software for human experiments.

Cell population abundance

n/a

Gating strategy

Gating strategies are shown in Extended data Figures 1 and 2.

- ☒ Tick this box to confirm that a figure exemplifying the gating strategy is provided in the Supplementary Information.
